# Supplementary material for: Growth of nickel silicate nanoplates on reduced graphene oxide as layered nanocomposites for highly reversible lithium storage
Source: Royal Society of Chemistry journal article supplement (doi:10.1039/c5nr05719a), 2015-01-01
Supplement: c5nr05719a1.pdf [file c5nr05719a1.pdf]

## Supporting Information

### Growth of Nickel Silicate Nanoplates on Reduced Graphene Oxide as Layered Nanocomposite for Highly Reversible Lithium Storage

*Qian-Qian Wang, Jin Qu\*, Yuan Liu, Chen-Xi Gui, Shu-Meng Hao, Yunhua Yu and Zhong-Zhen Yu\**

State Key Laboratory of Organic-Inorganic Composites, College of Materials Science and Engineering, Beijing University of Chemical Technology, Beijing 100029, China

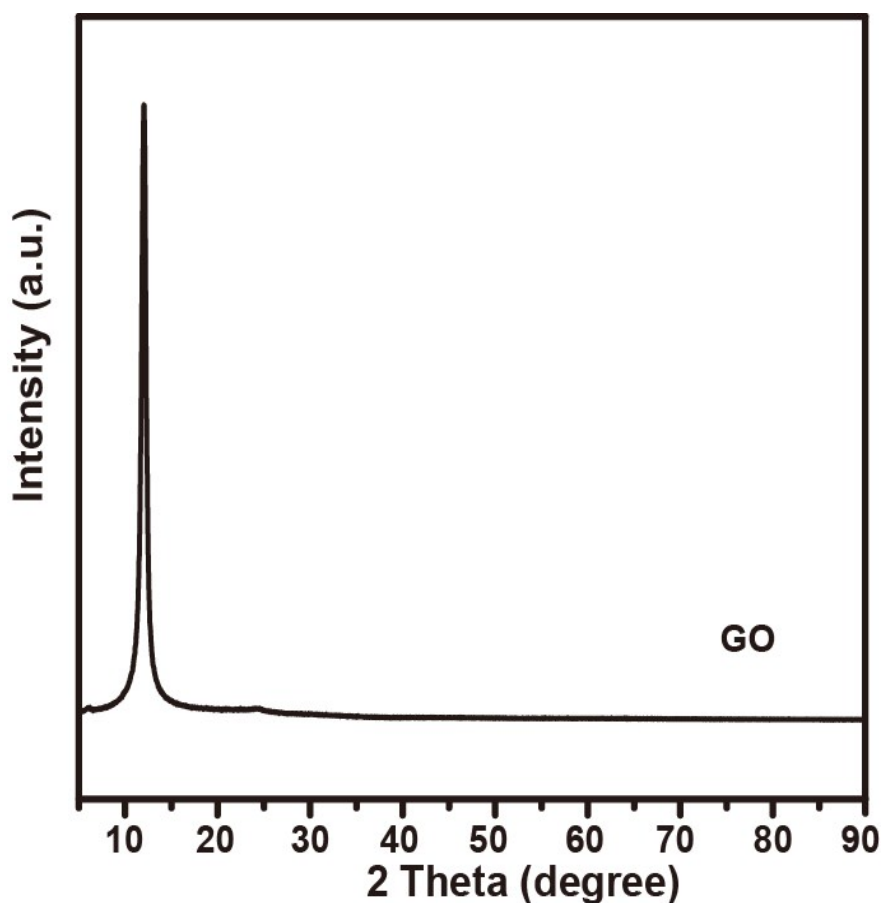

**Figure S1.** XRD pattern of GO.

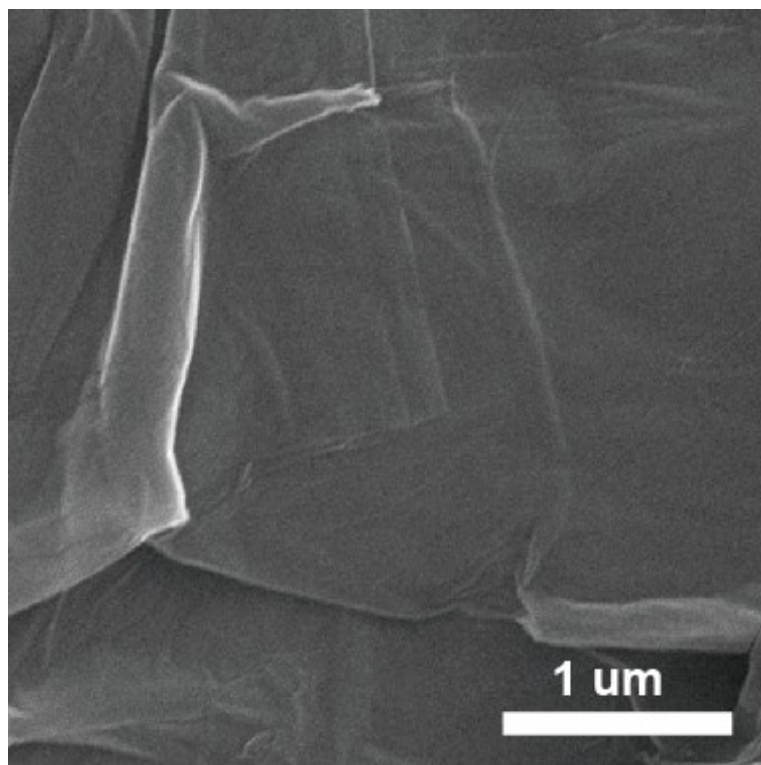

**Figure S2.** SEM image of GO.

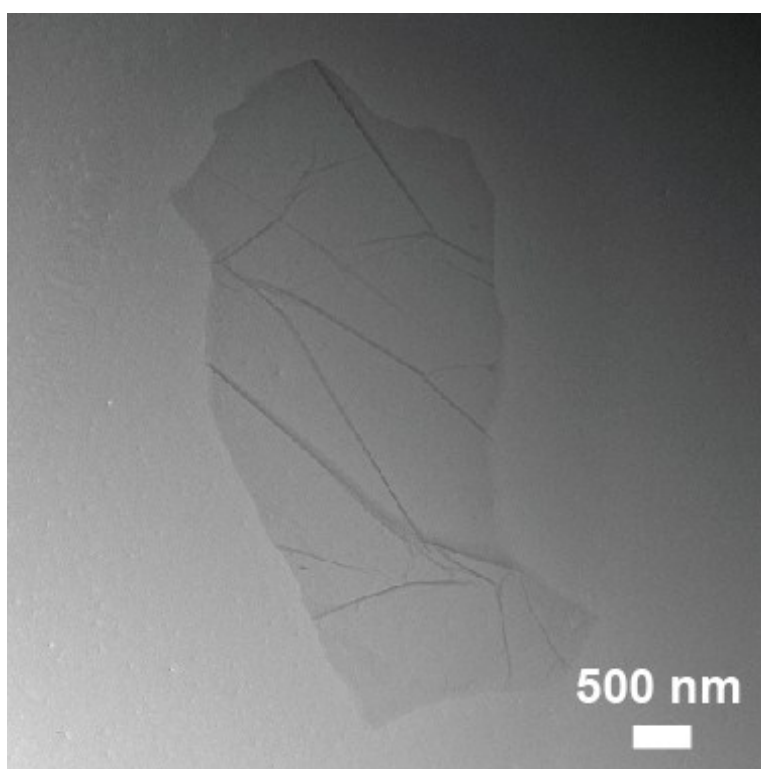

**Figure S3.** TEM image of GO.

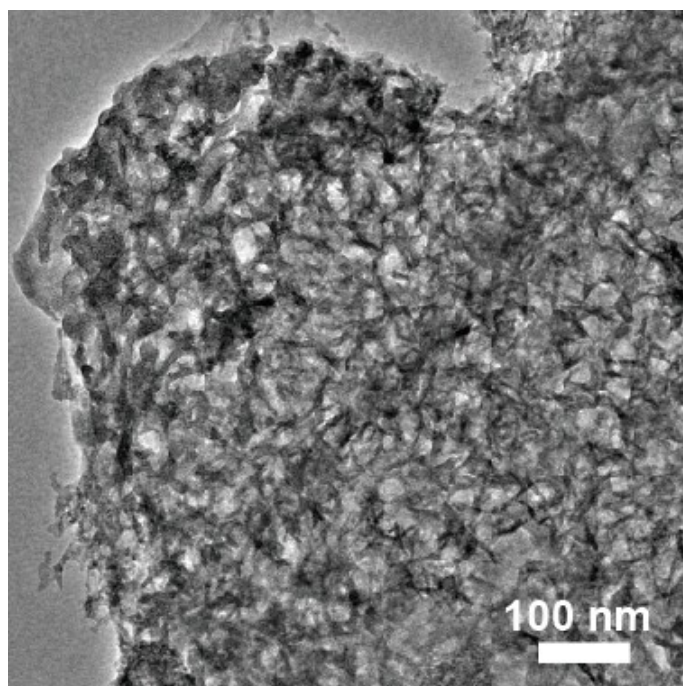

**Figure S4.** HRTEM image of NiSiOx/RGO nanocomposite after 50 charge/discharge cycles.

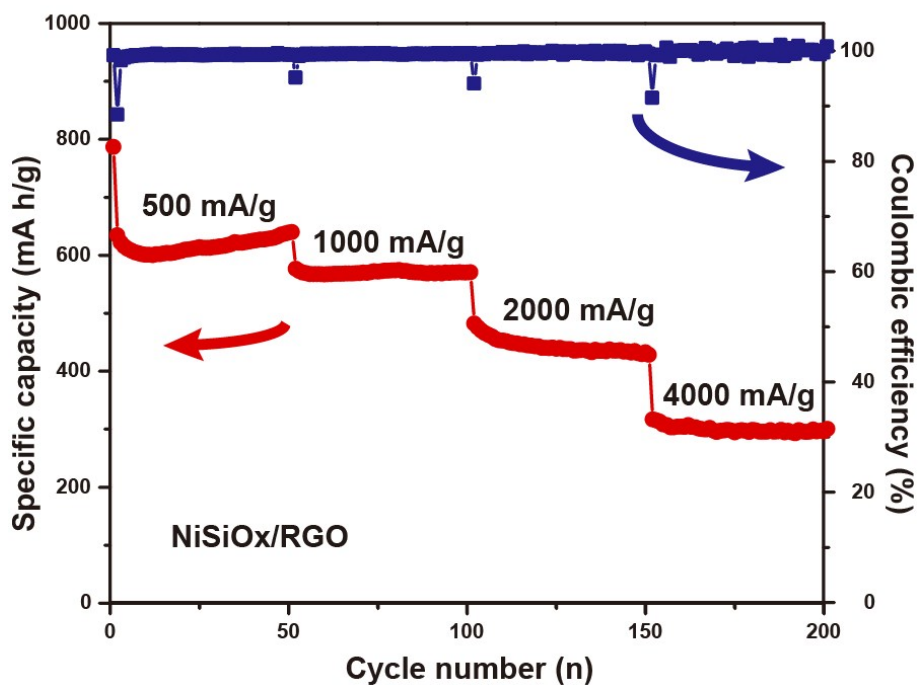

**Figure S5.** Charge capacities of NiSiOx/RGO nanocomposite at various rates of 500, 1000, 2000 and 4000mA/g for 50 cycles, respectively.

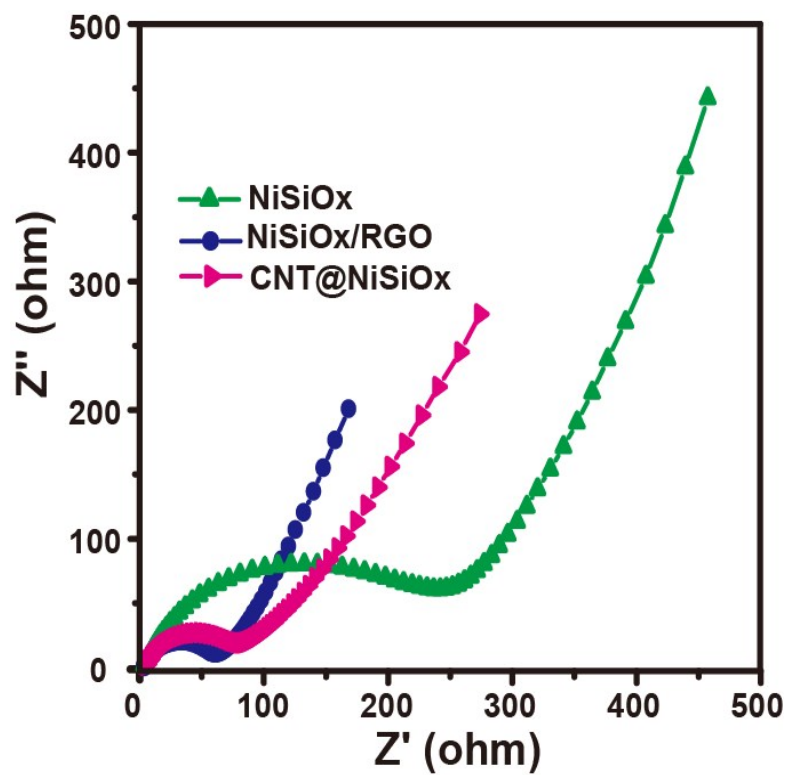

**Figure S6.** Electrochemical impedance spectra of NiSiOx, NiSiOx/RGO and CNT@NiSiOx nanocomposites.
